# Supplementary material
Source: PubMed Central journal article supplement (PMC10068114)

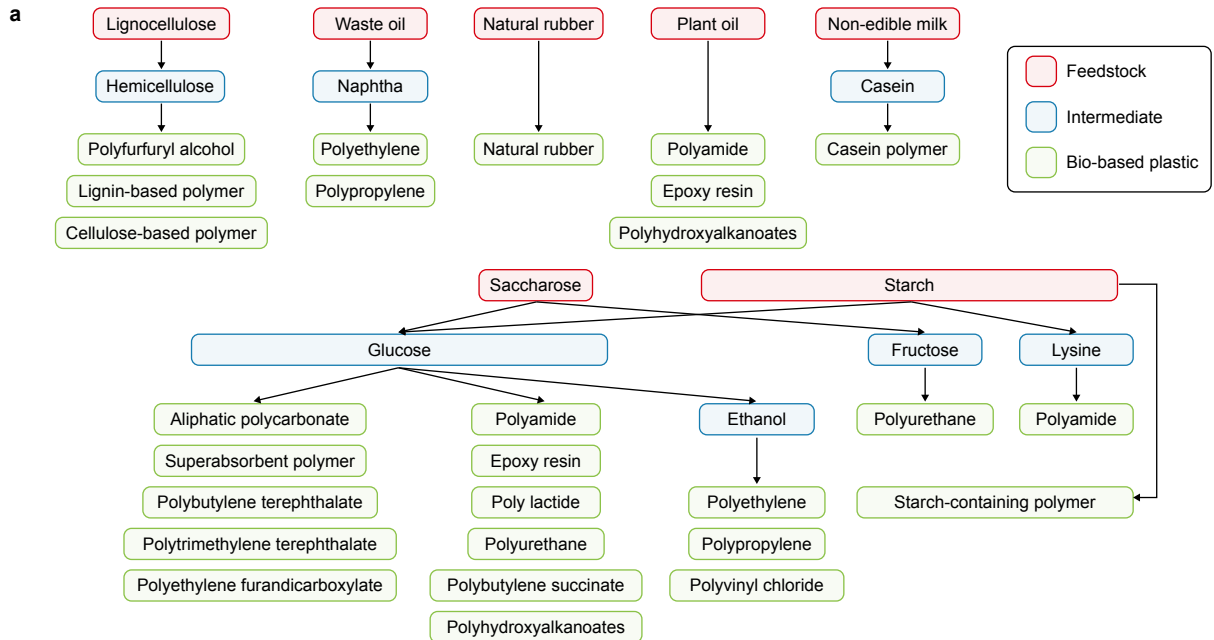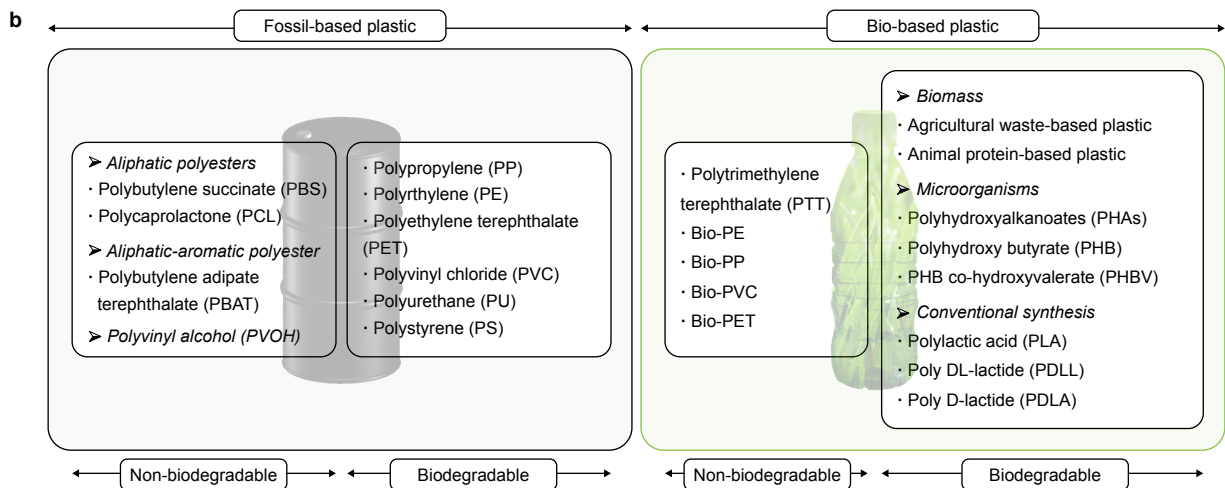

Supplement: mmc1.pdf [file mmc1.pdf]

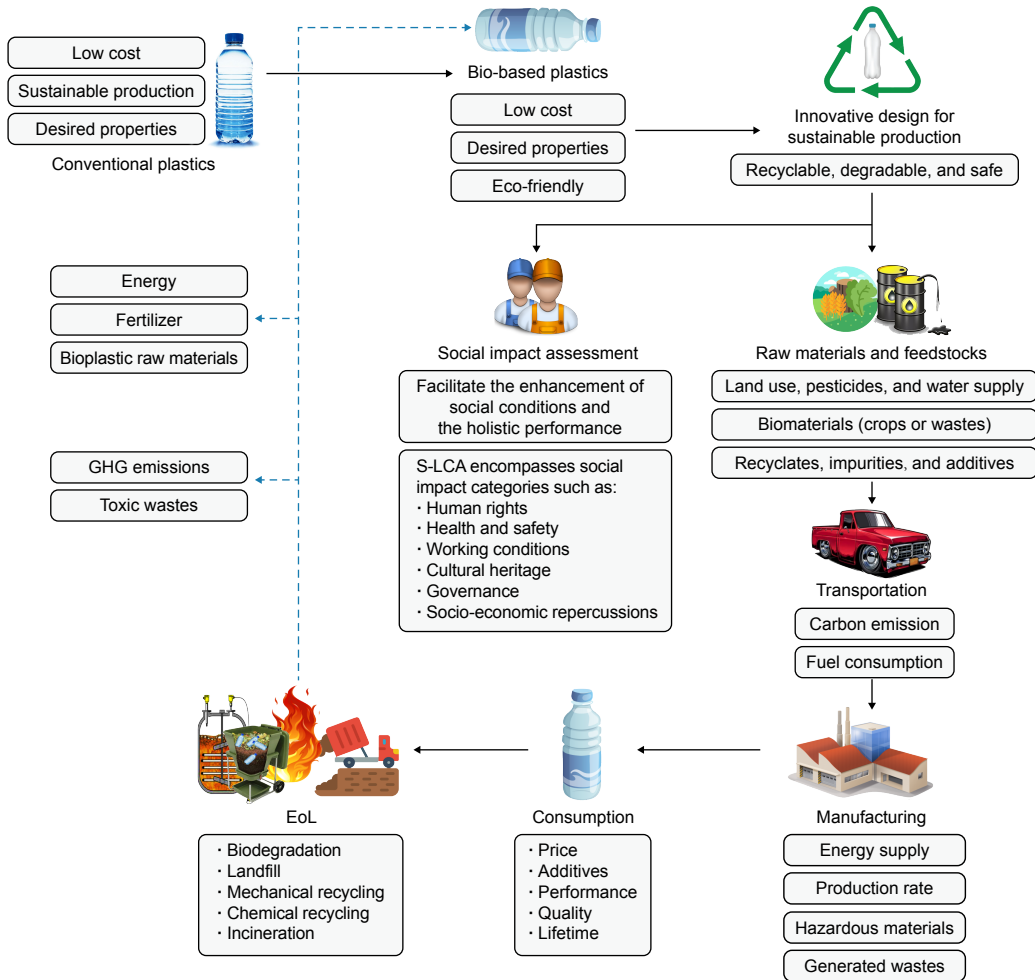

Supplement: mmc2.pdf [file mmc2.pdf]
